# Supplementary material for: Exploring the Contribution of Proximal Family Risk Factors on SLC6A4 DNA Methylation in Children with a History of Maltreatment: A Preliminary Study
Source: MDPI journal article supplement (doi:10.3390/ijerph182312736), 2021-12-02
Supplement: s1 [file s1]

## Significant Correlations' Scatterplots

**Table S1.** Spearman correlation between the cumulative risk exposure to proximal family risk factors (CFR) and *SLC6A4* DNA methylation at CpG5.

| <i>SLC6A4</i> DNA methylation<br>at CpG5 |            |       |
|------------------------------------------|------------|-------|
| CFR                                      | <i>Rho</i> | 0.467 |
|                                          | <i>p</i>   | 0.006 |
|                                          | <i>n</i>   | 33    |

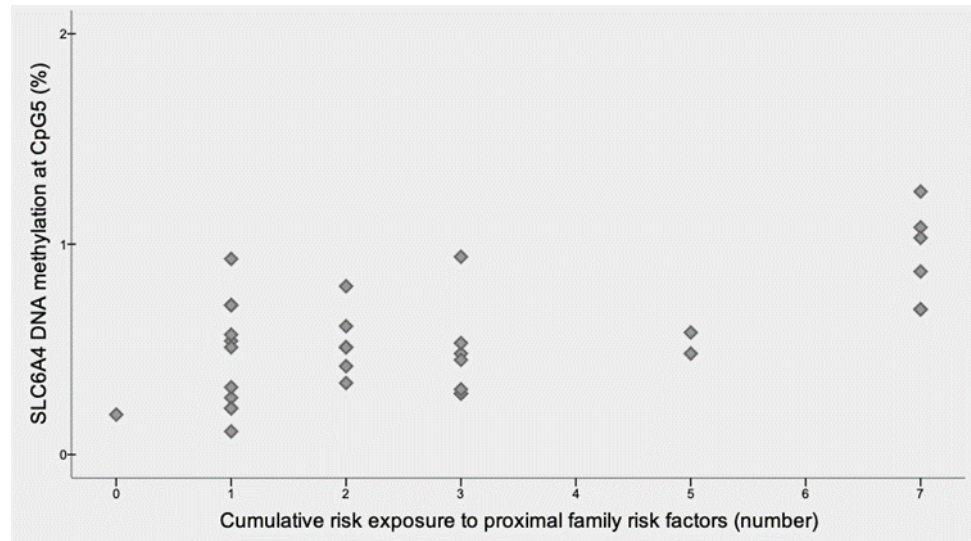

**Figure S1.** Scatterplots of correlation between the cumulative risk exposure to proximal family risk factors (CFR) and *SLC6A4* DNA methylation at CpG5.

**Table S2.** Spearman correlation between the cumulative risk exposure to proximal family risk factors (CFR) and *SLC6A4* DNA methylation at CpG13.

| <i>SLC6A4</i> DNA methylation<br>at CpG13 |            |       |
|-------------------------------------------|------------|-------|
| CFR                                       | <i>Rho</i> | 0.418 |
|                                           | <i>p</i>   | 0.016 |
|                                           | <i>n</i>   | 33    |

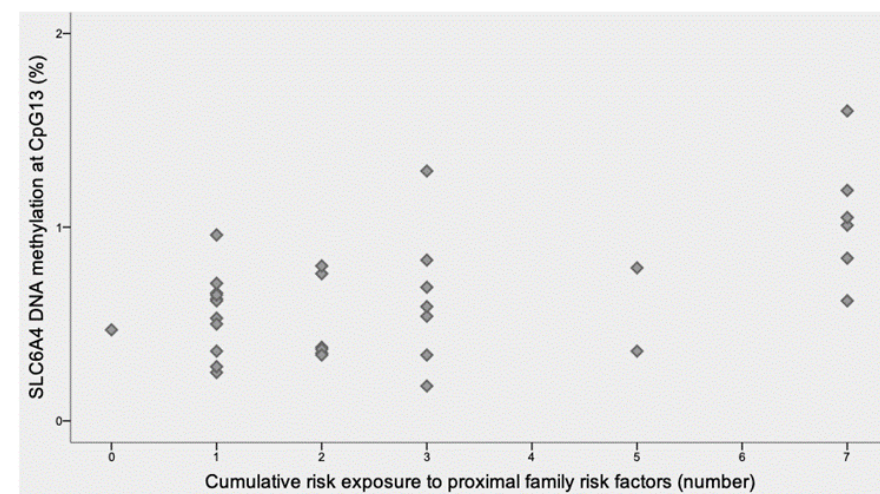

**Figure S2.** Scatterplots of correlation between the cumulative risk exposure to proximal family risk factors (CFR) and *SLC6A4* DNA methylation at CpG13.
